# Supplementary material for: Synthesis of Co2FeGe Heusler alloy nanoparticles and catalysis for selective hydrogenation of propyne
Source: Royal Society of Chemistry journal article supplement (doi:10.1039/d1ra02884g), 2021-01-01
Supplement: d1ra02884g1.pdf [file d1ra02884g1.pdf]

## Electronic Supplementary Information

### Synthesis of Co<sub>2</sub>FeGe Heusler alloy nanoparticles and catalysis for selective hydrogenation of propyne

Takayuki Kojima,<sup>\*a,b,†</sup> Yuki Nakaya,<sup>c</sup> Hyugwon Ham,<sup>c</sup>  
Satoshi Kameoka,<sup>b</sup> Shinya Furukawa<sup>\*c</sup>

<sup>a</sup> Frontier Research Institute for Interdisciplinary Sciences, Tohoku University  
Sendai, Japan

<sup>b</sup> Institute of Multidisciplinary Research for Advanced Materials, Tohoku University,  
Sendai, Japan

<sup>c</sup> Institute for Catalysis, Hokkaido University, Sapporo, Japan

<sup>†</sup> Present address: Division of Chemistry and Materials, Faculty of Textile Science  
and Technology, Shinshu University, Ueda, Japan

\* Corresponding authors

TK: [tkojima@shinshu-u.ac.jp](mailto:tkojima@shinshu-u.ac.jp)

SF: [furukawa@cat.hokudai.ac.jp](mailto:furukawa@cat.hokudai.ac.jp)

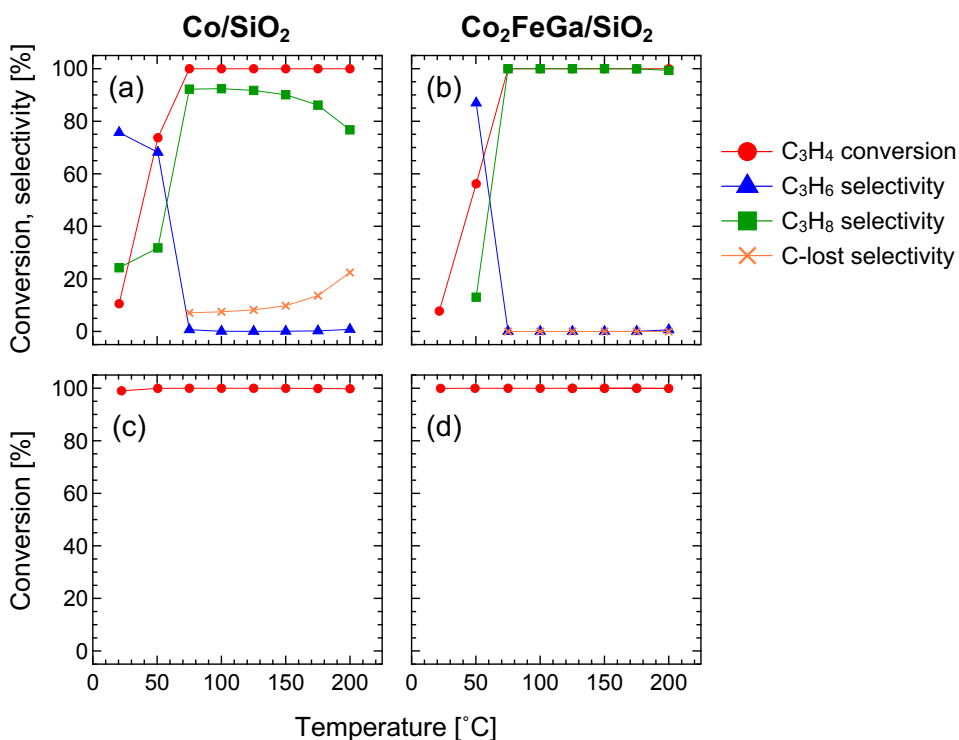

Fig. S1. Results of (a,b)  $\text{C}_3\text{H}_4$  hydrogenation and (c,d)  $\text{C}_3\text{H}_6$  hydrogenation for (a,c)  $\text{Co}/\text{SiO}_2$  and (b,d)  $\text{Co}_2\text{FeGa}/\text{SiO}_2$ . Legends at the right side of (b) are available for (a,b). The weight of catalysts used was 10 mg for all tests. All other reaction conditions were the same as those for  $\text{Co}_2\text{FeGe}/\text{SiO}_2$ . These catalysts were synthesized in the same manner as  $\text{Co}_2\text{FeGe}/\text{SiO}_2$  except that  $\text{Ga}(\text{NO}_3)_3 \cdot 8\text{H}_2\text{O}$  was used and the Co weight was 3.5 wt% for  $\text{Co}_2\text{FeGa}/\text{SiO}_2$ .

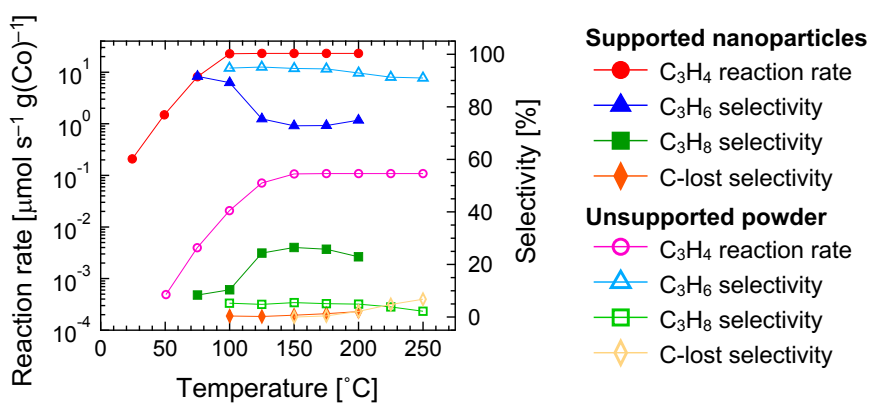

Fig. S2. Comparison between  $\text{Co}_2\text{FeGe}/\text{SiO}_2$  and unsupported  $\text{Co}_2\text{FeGe}$  for  $\text{C}_3\text{H}_4$  hydrogenation. Plateau for reaction rate corresponds to 100% of conversion. Data for unsupported  $\text{Co}_2\text{FeGe}$  was excerpted from Ref. [S1] licensed under CC BY-NC (<http://creativecommons.org/licenses/by-nc/4.0>).

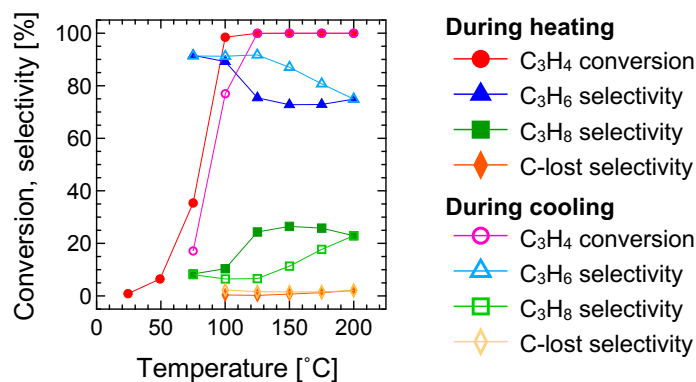

Fig. S3. Catalytic properties of Co<sub>2</sub>FeGe/SiO<sub>2</sub> for C<sub>3</sub>H<sub>4</sub> hydrogenation during heating and cooling cycle.

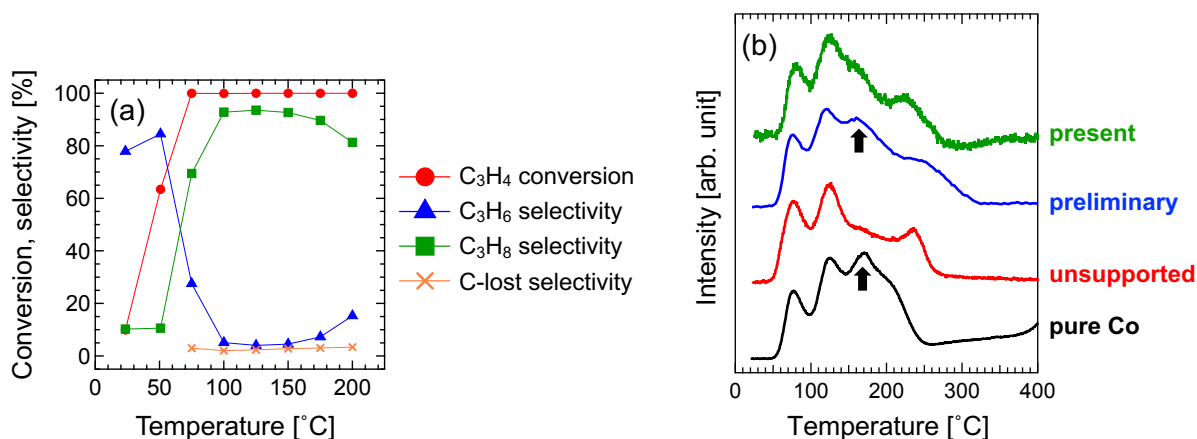

Fig. S4. (a) Example of preliminary results of C<sub>3</sub>H<sub>4</sub> hydrogenation for Co<sub>2</sub>FeGe/SiO<sub>2</sub> prepared with loading atomic ratio of Co:Fe:Ge = 2:1:1 and (b) profiles of temperature programmed CO desorption measured by mass spectroscopy for present Co<sub>2</sub>FeGe/SiO<sub>2</sub> (loaded Co:Fe:Ge = 1.8:1:1), preliminary Co<sub>2</sub>FeGe/SiO<sub>2</sub>, unsupported Co<sub>2</sub>FeGe, and unsupported pure Co. In (b), a specific peak likely originated from the non-selective active sites is indicated by arrow, and data for unsupported Co<sub>2</sub>FeGe and pure Co were reproduced from Ref. [S2] with permission from The Royal Society of Chemistry.

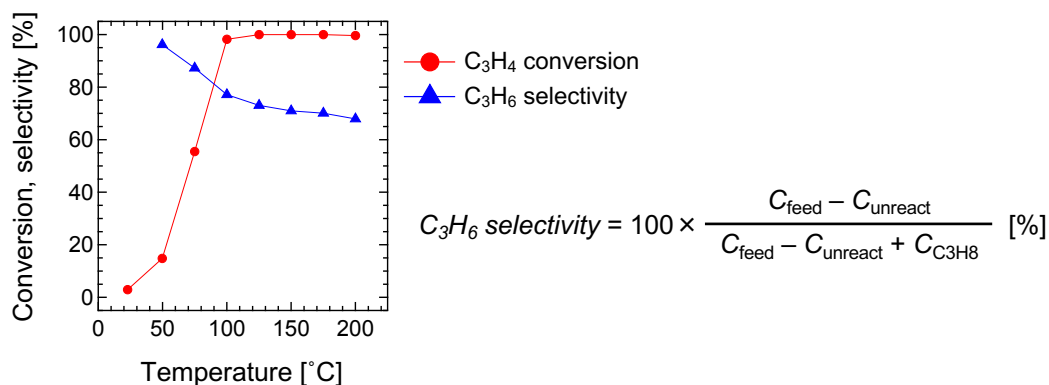

Fig. S5. Catalytic properties of Co<sub>2</sub>FeGe/SiO<sub>2</sub> for selective hydrogenation of C<sub>3</sub>H<sub>4</sub> in the presence of abundant C<sub>3</sub>H<sub>6</sub> using a reactant of [0.1%C<sub>3</sub>H<sub>4</sub> / 10%C<sub>3</sub>H<sub>6</sub> / 40%H<sub>2</sub> / He-balance]. The C<sub>3</sub>H<sub>6</sub> selectivity was evaluated by the displayed equation [S1], where C<sub>feed</sub>, C<sub>unreact</sub>, and C<sub>C<sub>3</sub>H<sub>8</sub></sub> were the concentrations of the feed C<sub>3</sub>H<sub>4</sub>, the unreacted C<sub>3</sub>H<sub>4</sub>, and the produced C<sub>3</sub>H<sub>8</sub>, respectively. The weight of catalyst used was 60 mg. All other reaction conditions were the same as those in other reactions.

## References

- S1. T. Kojima, S. Kameoka, S. Fujii, S. Ueda and A.-P. Tsai, *Sci. Adv.*, 2018, **4**, eaat6063.  
 S2. T. Kojima, T. Koganezaki, S. Fujii, S. Kameoka, and A.-P. Tsai, *Catal. Sci. Technol.*, 2021 (in press). DOI: 10.1039/D1CY00279A
